# Supplementary material for: Nutraceutical potential of industrial hemp (Cannabis sativa L.) extracts: physicochemical stability and bioaccessibility of cannabidiol (CBD) nanoemulsions
Source: Royal Society of Chemistry journal article supplement (doi:10.1039/d1fo04433h), 2022-01-01
Supplement: d1fo04433h1.pdf [file d1fo04433h1.pdf]

## Supporting information

### **Nutraceutical potential of industrial hemp (*Cannabis sativa* L.) extracts: physicochemical, and bioaccessibility of cannabidiol (CBD) nanoemulsions**

Huijuan Zheng, Bingcan Chen, Jiajia Rao\*

Food Ingredients and Biopolymers Laboratory, Department of Plant Sciences, North Dakota  
State University, Fargo, ND 58102

Tel: (701) 231-6277. Fax: (701) 231-7723. E-mail: [Jiajia.rao@ndsu.edu](mailto:Jiajia.rao@ndsu.edu).

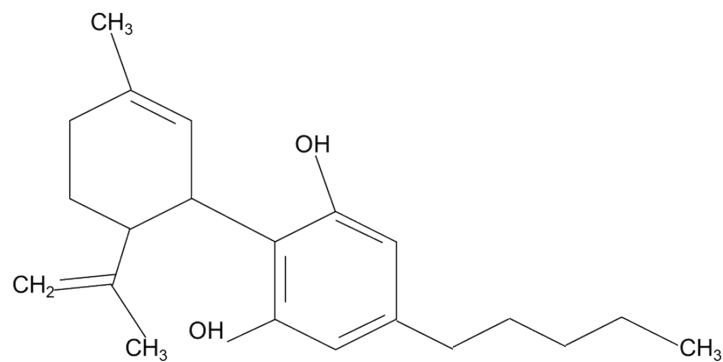

**Fig. S1.** Molecular structure of cannabidiol (CBD)

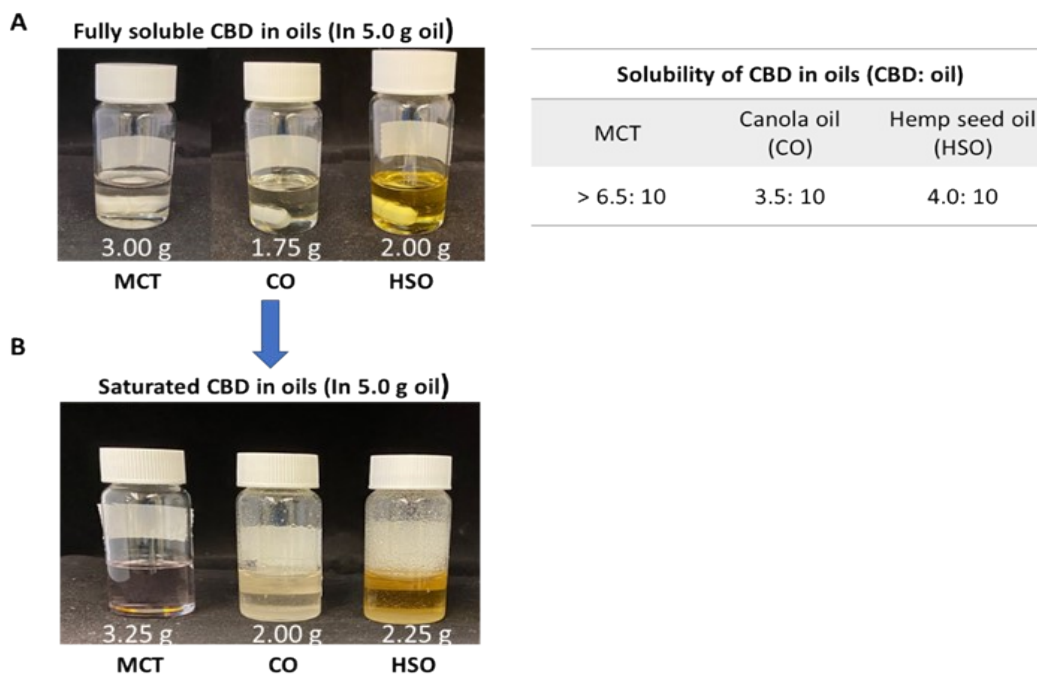

**Figure S2.** Solubility test of CBD in different types of carrier oil. **(A)** Soluble concentrations of CBD in varietal oils; **(B)** Saturated concentrations of CBD in carrier oils.

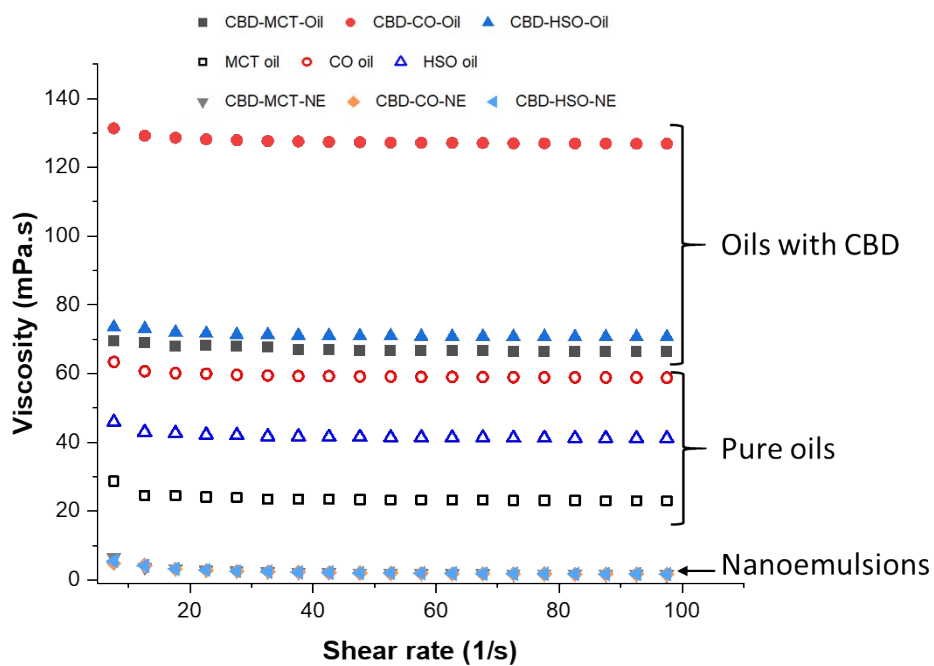

**Figure S3.** Viscosity of carrier oils, dispersed phases of nanoemulsions and nanoemulsions: pure oils, oils with CBD dissolved, and nanoemulsions.

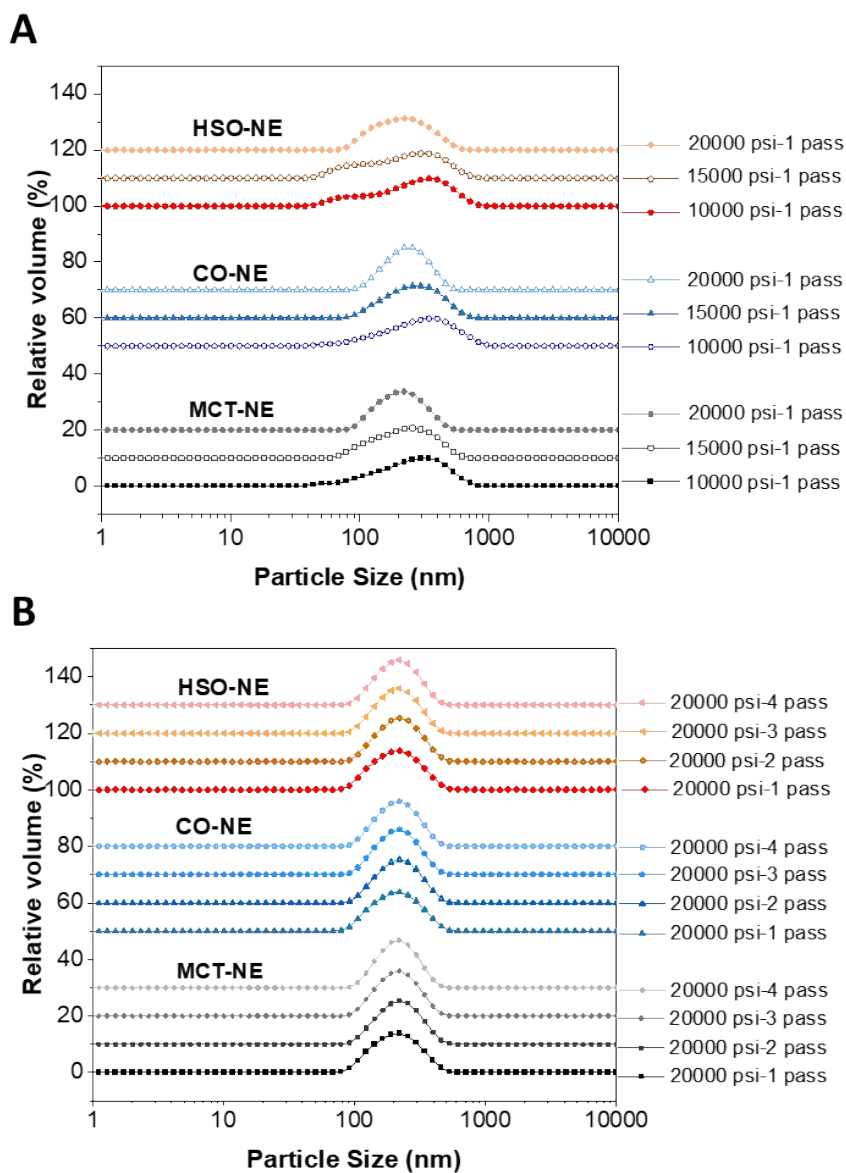

**Figure S4.** Particle size distribution of CBD nanoemulsions as affected by: (A) Different pressures (10000, 15000 and 20000 psi with 1 pass); (B) Number of passes (20,000 psi at 1, 2, 3 and 4 passes). MCT, CO, HSO and NE is short for medium chain triacylglycerides, canola oil, hemp seed oil and nanoemulsion, respectively. Note: The volume fraction was stacked up the y-axis for comparison (using an increment of 10%).

**A**

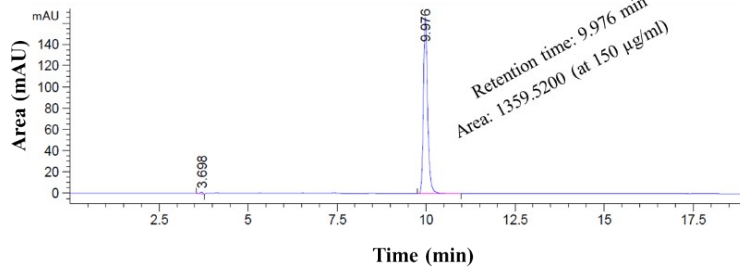

**B**

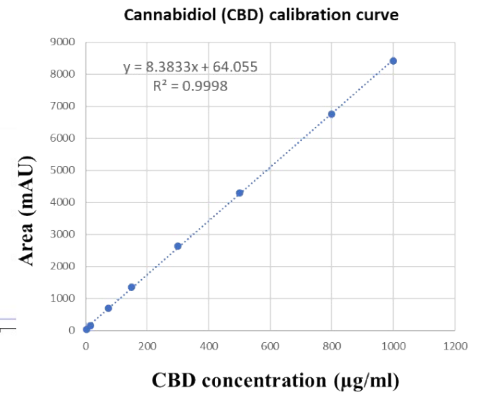

**Figure S5.** (A) Chromatogram of CBD solution of 150 µg/ml; (B) Calibration curve of CBD (3-1000 µg/ml) by HPLC
